# Supplementary material
Source: bioRxiv or medRxiv preprint supplement (https://www.biorxiv.org/highwire/filestream/7462/field_highwire_adjunct_files/1/023911-2.pdf)
Supplement: Supplementary file [file 023911-2.pdf]

# Supplementary Data 1: ENCODE datasets used in ChromNet (1,415 total)

## **K562** - 238 datasets

ENCSR000EFY (ARID3A), ENCSR000DNZ (ATF1), ENCSR000DOG (ATF3),  
ENCSR000BNU (ATF3), ENCSR972ZBV (ATF7), ENCSR000EGD (BACH1),  
ENCSR000BKH (BCLAF1), ENCSR000DOK (BDP1), ENCSR000EGV (BHLHE40),  
ENCSR782WRO (BMI1), ENCSR443YGY (BMI1), ENCSR000DOJ (BRF1),  
ENCSR000DOC (BRF2), ENCSR000ATU (CBX2), ENCSR000ATV (CBX3),  
ENCSR000BRT (CBX3), ENCSR272JAT (CBX5), ENCSR000ATW (CBX8),  
ENCSR000DOA (CCNT2), ENCSR000EHE (CEBPB), ENCSR000BRQ (CEBPB),  
ENCSR000BVY (CEBPD), ENCSR618GDK (CEBPZ), ENCSR000AQD (CHD1),  
ENCSR000EHD (CHD2), ENCSR000ATL (CHD4), ENCSR000AVD (CHD7),  
ENCSR000BSO (CREB1), ENCSR109YGM (CREB3L1), ENCSR000ATT (CREBBP),  
ENCSR077DKV (CREM), ENCSR000DMA (CTCF), ENCSR000DWE (CTCF),  
ENCSR000EGM (CTCF), ENCSR000AKO (CTCF), ENCSR000BPJ (CTCF),  
ENCSR000BNK (CTCFL), ENCSR000EFO (CUX1), ENCSR000EWL (E2F4),  
ENCSR000EWJ (E2F6), ENCSR000BLI (E2F6), ENCSR000DKB (eGFP-FOS),  
ENCSR000DKA (eGFP-GATA2), ENCSR000DJZ (eGFP-HDAC8), ENCSR000DJY  
(eGFP-JUNB), ENCSR000DJX (eGFP-JUND), ENCSR000DJW (eGFP-NR4A1),  
ENCSR000BNE (EGR1), ENCSR000BMD (ELF1), ENCSR000EFU (ELK1),  
ENCSR000EGY (EP300), ENCSR000EGE (EP300), ENCSR000AQB (EP300),  
ENCSR486IFJ (ESRRA), ENCSR000BKQ (ETS1), ENCSR124BJR (ETV6),  
ENCSR000FCE (ETV6), ENCSR000AQE (EZH2), ENCSR000FAI (FOS),  
ENCSR000BMV (FOSL1), ENCSR000BLO (GABPA), ENCSR000EWM (GATA1),  
ENCSR000EFT (GATA1), ENCSR000EWG (GATA2), ENCSR000BKM (GATA2),  
ENCSR509GDT (GF11B), ENCSR000DOE (GTF2B), ENCSR000EHC (GTF2F1),  
ENCSR000DOD (GTF3C2), ENCSR000APC (H2AFZ), ENCSR000AKP (H3K27ac),  
ENCSR000EWB (H3K27me3), ENCSR000DWC (H3K27me3), ENCSR000AKQ  
(H3K27me3), ENCSR000DWB (H3K36me3), ENCSR000AKR (H3K36me3),  
ENCSR000EWC (H3K4me1), ENCSR000AKS (H3K4me1), ENCSR000AKT (H3K4me2),  
ENCSR000EWA (H3K4me3), ENCSR000DWD (H3K4me3), ENCSR000AKU (H3K4me3),  
ENCSR000APD (H3K79me2), ENCSR000EVZ (H3K9ac), ENCSR000AKV (H3K9ac),  
ENCSR000AKW (H3K9me1), ENCSR000APE (H3K9me3), ENCSR000AKX  
(H4K20me1), ENCSR000EFN (HCFC1), ENCSR000AQF (HDAC1), ENCSR000AQG  
(HDAC2), ENCSR000BMG (HDAC2), ENCSR000ATJ (HDAC6), ENCSR000DOB  
(HMG3), ENCSR000EGK (IRF1), ENCSR000EGL (IRF1), ENCSR000EGU (IRF1),  
ENCSR000EGT (IRF1), ENCSR376WCJ (IRF2), ENCSR000EFS (JUN),  
ENCSR000EGH (JUN), ENCSR000EZW (JUN), ENCSR000EZT (JUN), ENCSR000EZX  
(JUN), ENCSR000FAH (JUN), ENCSR000EGN (JUND), ENCSR000ATZ (KAT2B),

ENCSR000ATX (KDM1A), ENCSR000AQA (KDM5B), ENCSR000EGI (MAFF),  
ENCSR000EGX (MAFK), ENCSR000EFV (MAX), ENCSR000FAE (MAX),  
ENCSR000BLP (MAX), ENCSR000EFX (MAZ), ENCSR000BNV (MEF2A),  
ENCSR851BNE (MEIS2), ENCSR000FCB (MITF), ENCSR180NCY (MTA3),  
ENCSR000EGZ (MXI1), ENCSR000DLZ (MYC), ENCSR000EGJ (MYC),  
ENCSR000EGS (MYC), ENCSR000EZU (MYC), ENCSR000EZV (MYC),  
ENCSR000FAZ (MYC), ENCSR000FAG (MYC), ENCSR000ATY (NCOR1),  
ENCSR000DOF (NELFE), ENCSR986CDX (NEUROD1), ENCSR000FAF (NFE2),  
ENCSR000FCC (NFE2), ENCSR485GKE (NFE2L2), ENCSR000EGR (NFYA),  
ENCSR000EGQ (NFYB), ENCSR111HAT (NONO), ENCSR010KFT (NONO),  
ENCSR574GKC (NR1H2), ENCSR000EWH (NR2C2), ENCSR000BRS (NR2F2),  
ENCSR494TDU (NRF1), ENCSR998AJK (NRF1), ENCSR000EHH (NRF1),  
ENCSR274CGK (PAX8), ENCSR979UVS (PBX2), ENCSR000AQH (PHF8),  
ENCSR000BQY (PML), ENCSR000DLY (POLR2A), ENCSR000EHL (POLR2A),  
ENCSR000EHP (POLR2A), ENCSR000FAW (POLR2A), ENCSR000FAX (POLR2A),  
ENCSR000FAY (POLR2A), ENCSR000FAJ (POLR2A), ENCSR000BMR (POLR2A),  
ENCSR000EHF (POLR2AphosphoS2), ENCSR000EGF (POLR2AphosphoS2),  
ENCSR000BKR (POLR2AphosphoS5), ENCSR000DOI (POLR3A), ENCSR000EHQ  
(POLR3G), ENCSR364SNE (POU5F1), ENCSR000FAD (RAD21), ENCSR000BKV  
(RAD21), ENCSR506CVF (RB1), ENCSR000AQI (RBBP5), ENCSR000EGC (RCOR1),  
ENCSR000EGG (RCOR1), ENCSR137ZMQ (REST), ENCSR000ATM (REST),  
ENCSR000BMW (REST), ENCSR000EGO (RFX5), ENCSR138FUZ (RNF2),  
ENCSR000AUA (RNF2), ENCSR414TYT (RUNX1), ENCSR000AQJ (SAP30),  
ENCSR000EWD (SETDB1), ENCSR000EWI (SETDB1), ENCSR000AUT (SETDB1),  
ENCSR000BLR (SIN3A), ENCSR887ZEN (SIN3B), ENCSR000DOH (SIRT6),  
ENCSR000AUB (SIRT6), ENCSR000BGX (SIX5), ENCSR000BNW (SIX5),  
ENCSR038DJJ (SMAD1), ENCSR189PYJ (SMAD2), ENCSR000FCD (SMAD5),  
ENCSR000EHO (SMARCA4), ENCSR000EHN (SMARCB1), ENCSR000EGW (SMC3),  
ENCSR788RSW (SOX6), ENCSR991ELG (SP1), ENCSR000BKO (SP1), ENCSR000BNL  
(SP2), ENCSR000BGW (SPI1), ENCSR815ZDS (SREBF1), ENCSR000BLK (SRF),  
ENCSR000EHK (STAT1), ENCSR000EHJ (STAT1), ENCSR000FAU (STAT1),  
ENCSR000FAV (STAT1), ENCSR000FBC (STAT2), ENCSR000FAT (STAT2),  
ENCSR000BRR (STAT5A), ENCSR000AUC (SUZ12), ENCSR000BKS (TAF1),  
ENCSR000BNM (TAF7), ENCSR000EHB (TAL1), ENCSR353HEP (TARDBP),  
ENCSR000EGA (TBL1XR1), ENCSR000EGB (TBL1XR1), ENCSR000EHA (TBP),  
ENCSR000FCF (TCF4), ENCSR000BRK (TEAD4), ENCSR224IKA (TFDP1),  
ENCSR000BNN (THAP1), ENCSR000EVY (TRIM28), ENCSR000BRW (TRIM28),  
ENCSR000EFW (UBTF), ENCSR000EFZ (UBTF), ENCSR000BKT (USF1),  
ENCSR000EHG (USF2), ENCSR000AVE (WHSC1), ENCSR000FAC (XRCC4),  
ENCSR000EWF (YY1), ENCSR000BMH (YY1), ENCSR000BKY (YY1),  
ENCSR286PCG (ZBED1), ENCSR000BKF (ZBTB33), ENCSR000BME (ZBTB7A),  
ENCSR000EFR (ZC3H11A), ENCSR557RVF (ZHX1), ENCSR000EFQ (ZMIZ1),  
ENCSR000EGP (ZNF143), ENCSR000EWN (ZNF263), ENCSR000EWE (ZNF274),  
ENCSR000EVX (ZNF274), ENCSR000EFP (ZNF384)

**GM12878** - 146 datasets

ENCSR725LYT (ARID3A), ENCSR000BQK (ATF2), ENCSR000BJY (ATF3),  
ENCSR585CVE (BACH1), ENCSR000BGT (BATF), ENCSR000BHA (BCL11A),

ENCSR000BNQ (BCL3), ENCSR000BJZ (BCLAF1), ENCSR517QHU (BHLHE40),  
ENCSR000DZJ (BHLHE40), ENCSR000DZS (BRCA1), ENCSR681NOM (CEBPB),  
ENCSR000BRX (CEBPB), ENCSR000DZE (CHD1), ENCSR000DZR (CHD2),  
ENCSR000BUF (CREB1), ENCSR839XZU (CREM), ENCSR000DKV (CTCF),  
ENCSR000DRZ (CTCF), ENCSR000DZN (CTCF), ENCSR000AKB (CTCF),  
ENCSR000DYR (CUX1), ENCSR000DYY (E2F4), ENCSR000DZQ (EBF1),  
ENCSR000BGU (EBF1), ENCSR000BMQ (EGR1), ENCSR000BRG (EGR1),  
ENCSR000BMB (ELF1), ENCSR000DZB (ELK1), ENCSR617GUC (EP300),  
ENCSR000DZG (EP300), ENCSR000DZD (EP300), ENCSR000DZT (EP300),  
ENCSR000BHB (EP300), ENCSR000DYQ (ESRRA), ENCSR000BKA (ETS1),  
ENCSR597VGC (ETV6), ENCSR626VUC (ETV6), ENCSR000ARD (EZH2),  
ENCSR000EYZ (FOS), ENCSR000BRU (FOXM1), ENCSR331HPA (GABPA),  
ENCSR000BGC (GABPA), ENCSR769ZTN (GTF2F1), ENCSR000AOV (H2AFZ),  
ENCSR000AKC (H3K27ac), ENCSR000DRX (H3K27me3), ENCSR000AKD  
(H3K27me3), ENCSR000DRW (H3K36me3), ENCSR000AKE (H3K36me3),  
ENCSR000AKF (H3K4me1), ENCSR000AKG (H3K4me2), ENCSR000DRY (H3K4me3),  
ENCSR000AKA (H3K4me3), ENCSR000AOW (H3K79me2), ENCSR000AKH (H3K9ac),  
ENCSR000AOX (H3K9me3), ENCSR000AKI (H4K20me1), ENCSR514VAY (HCFC1),  
ENCSR009MBP (HSF1), ENCSR000EUJ (IKZF1), ENCSR408JQO (IRF3),  
ENCSR000DZX (IRF3), ENCSR000BGY (IRF4), ENCSR000DYS (JUND),  
ENCSR000EYV (JUND), ENCSR000DNO (KAT2A), ENCSR974OFJ (KLF5),  
ENCSR237YZZ (MAFF), ENCSR000DYV (MAFK), ENCSR000DZF (MAX),  
ENCSR000DZA (MAZ), ENCSR000BKB (MEF2A), ENCSR000BNG (MEF2C),  
ENCSR000BRH (MTA3), ENCSR441JTL (MXI1), ENCSR000DZI (MXI1),  
ENCSR819ATC (MYB), ENCSR000DKU (MYC), ENCSR000BQL (NFATC1),  
ENCSR000DZY (NFE2), ENCSR000BRN (NFIC), ENCSR000DNN (NFYA),  
ENCSR000DNM (NFYB), ENCSR000EUL (NR2C2), ENCSR904YPP (NR3C1),  
ENCSR000DZO (NRF1), ENCSR000BHJ (PAX5), ENCSR000BHD (PAX5),  
ENCSR000BGR (PBX3), ENCSR000BQM (PML), ENCSR000DKT (POLR2A),  
ENCSR000EAD (POLR2A), ENCSR000BGD (POLR2A), ENCSR000DZK  
(POLR2AphosphoS2), ENCSR000BIF (POLR2AphosphoS5), ENCSR000EYU  
(POLR3G), ENCSR000BGP (POU2F2), ENCSR000EAC (RAD21), ENCSR000BMY  
(RAD21), ENCSR916BOH (RB1), ENCSR000DZC (RCOR1), ENCSR664POU (RELA),  
ENCSR000EAG (RELA), ENCSR000BGF (REST), ENCSR000BQS (REST),  
ENCSR000DZW (RFX5), ENCSR679FAB (RNF2), ENCSR000BRI (RUNX3),  
ENCSR000BJD (RXRA), ENCSR000DYX (SIN3A), ENCSR000BJE (SIX5),  
ENCSR000DZP (SMC3), ENCSR000BHK (SP1), ENCSR000BGQ (SPI1),  
ENCSR000DYU (SREBF1), ENCSR000DYT (SREBF2), ENCSR000BGE (SRF),  
ENCSR000BMI (SRF), ENCSR332EYT (STAT1), ENCSR000DZM (STAT1),  
ENCSR000DZV (STAT3), ENCSR000BQZ (STAT5A), ENCSR000DNP (SUPT20H),  
ENCSR000BGS (TAF1), ENCSR016UEH (TARDBP), ENCSR000DYZ (TBL1XR1),  
ENCSR000DZZ (TBP), ENCSR000BGZ (TCF12), ENCSR000BQT (TCF3),  
ENCSR501DKS (TCF7), ENCSR637QAM (TRIM22), ENCSR459FTB (UBTF),  
ENCSR000BGI (USF1), ENCSR000DZU (USF2), ENCSR000EAA (WRNIP1),  
ENCSR000EUM (YY1), ENCSR000BNP (YY1), ENCSR000BHC (ZBTB33),  
ENCSR000BND (ZEB1), ENCSR900XDB (ZFP36), ENCSR000DZL (ZNF143),  
ENCSR117KWH (ZNF207), ENCSR000EUK (ZNF274), ENCSR000DYP (ZNF384),  
ENCSR000DNQ (ZZZ3)

### **HepG2 - 116 datasets**

ENCSR000EDP (ARID3A), ENCSR000BKE (ATF3), ENCSR699TNT (BACH1),  
ENCSR000EDT (BHLHE40), ENCSR000BID (BHLHE40), ENCSR000EDY (BRCA1),  
ENCSR000EEE (CEBPB), ENCSR000EEX (CEBPB), ENCSR000BQI (CEBPB),  
ENCSR000BQJ (CEBPD), ENCSR000EDO (CEBPZ), ENCSR000EED (CHD2),  
ENCSR000BVL (CREB1), ENCSR000DLS (CTCF), ENCSR000DUG (CTCF),  
ENCSR000AMA (CTCF), ENCSR000BIE (CTCF), ENCSR049KIZ (CUX1),  
ENCSR000BMZ (ELF1), ENCSR000EDV (EP300), ENCSR000BLW (EP300),  
ENCSR000EEW (ESRRA), ENCSR000ARI (EZH2), ENCSR177HDZ (FOS),  
ENCSR000BHP (FOSL2), ENCSR000BLE (FOXA1), ENCSR000BMO (FOXA1),  
ENCSR000BNI (FOXA2), ENCSR000BJK (GABPA), ENCSR219NRT (GTF2F1),  
ENCSR000AOK (H2AFZ), ENCSR000AMO (H3K27ac), ENCSR000DUE (H3K27me3),  
ENCSR000AOL (H3K27me3), ENCSR000DUD (H3K36me3), ENCSR000AMB  
(H3K36me3), ENCSR000APV (H3K4me1), ENCSR000AMC (H3K4me2), ENCSR000DUF  
(H3K4me3), ENCSR000AMP (H3K4me3), ENCSR000AOM (H3K79me2),  
ENCSR000AMD (H3K9ac), ENCSR000ATD (H3K9me3), ENCSR000AMQ (H4K20me1),  
ENCSR529JYA (HCFC1), ENCSR000BMC (HDAC2), ENCSR000EEU (HNF4A),  
ENCSR000BLF (HNF4A), ENCSR000BNJ (HNF4G), ENCSR000EET (HSF1),  
ENCSR000EEJ (IRF3), ENCSR000EEK (JUN), ENCSR000EEI (JUND),  
ENCSR000BGK (JUND), ENCSR620YNB (KAT2B), ENCSR000EEC (MAFF),  
ENCSR000EDZ (MAFK), ENCSR000EEB (MAFK), ENCSR000EDS (MAX),  
ENCSR000BTM (MAX), ENCSR000EDN (MAZ), ENCSR000BQW (MBD4),  
ENCSR000EDU (MXI1), ENCSR000BRO (MYBL2), ENCSR000DLR (MYC),  
ENCSR488EES (NFE2L2), ENCSR000BQX (NFIC), ENCSR964ASM (NR1H2),  
ENCSR000EVS (NR2C2), ENCSR000BVM (NR2F2), ENCSR000EEV (NR3C1),  
ENCSR000EEH (NRF1), ENCSR000DLQ (POLR2A), ENCSR000EEM (POLR2A),  
ENCSR000EEP (POLR2A), ENCSR000EZQ (POLR2A), ENCSR000BJM (POLR2A),  
ENCSR000EDX (POLR2AphosphoS2), ENCSR000BPI (POLR2AphosphoS5),  
ENCSR000EEQ (PPARGC1A), ENCSR000EEG (RAD21), ENCSR000BLS (RAD21),  
ENCSR000EDQ (RCOR1), ENCSR000BJL (REST), ENCSR000BOT (REST),  
ENCSR928API (RFX1), ENCSR000EEA (RFX5), ENCSR000BHU (RXRA),  
ENCSR000BGL (SIN3A), ENCSR452YHM (SIN3B), ENCSR000EDW (SMC3),  
ENCSR000BJX (SP1), ENCSR000BOU (SP2), ENCSR000EEO (SREBF1),  
ENCSR000EZP (SREBF1), ENCSR000EZO (SREBF2), ENCSR000BLV (SRF),  
ENCSR771GTF (SUZ12), ENCSR000BJN (TAF1), ENCSR101FJS (TBL1XR1),  
ENCSR000EEL (TBP), ENCSR000BJG (TCF12), ENCSR000EVQ (TCF7L2),  
ENCSR000BRP (TEAD4), ENCSR000BGM (USF1), ENCSR000EEF (USF2),  
ENCSR000BNT (YY1), ENCSR000BNA (ZBTB33), ENCSR000BHR (ZBTB33),  
ENCSR000BQA (ZBTB7A), ENCSR000BVN (ZEB1), ENCSR407BEZ (ZHX2),  
ENCSR157CAU (ZKSCAN1), ENCSR101FJT (ZNF143), ENCSR000EVR (ZNF274),  
ENCSR101FJU (ZNF384)

### **A549 - 93 datasets**

ENCSR000BPS (ATF3), ENCSR043EHG (BACH1), ENCSR000BQH (BCL3),  
ENCSR000DYJ (BHLHE40), ENCSR857KDI (BRCA1), ENCSR000DYI (CEBPB),  
ENCSR000BUB (CEBPB), ENCSR398YBM (CHD1), ENCSR067HGI (CHD2),  
ENCSR000BRB (CREB1), ENCSR000BRC (CREB1), ENCSR000BRA (CREB1),

ENCSR000DNA (CTCF), ENCSR000DPF (CTCF), ENCSR000DYD (CTCF),  
 ENCSR000AUE (CTCF), ENCSR000AUF (CTCF), ENCSR000BHW (CTCF),  
 ENCSR000BHV (CTCF), ENCSR000BTC (E2F6), ENCSR000BPT (ELF1),  
 ENCSR623KNM (ELK1), ENCSR000BPW (EP300), ENCSR473SUA (ESRRA),  
 ENCSR000BPU (ETS1), ENCSR000BQO (FOSL2), ENCSR000BPX (FOXA1),  
 ENCSR000BRE (FOXA2), ENCSR000BPY (GABPA), ENCSR000BTI (GATA3),  
 ENCSR000AUH (H2AFZ), ENCSR000AUG (H2AFZ), ENCSR000AUI (H3K27ac),  
 ENCSR000AVF (H3K27ac), ENCSR000AUJ (H3K27me3), ENCSR000AUK (H3K27me3),  
 ENCSR000AVG (H3K36me3), ENCSR000AUL (H3K36me3), ENCSR000AVH  
 (H3K4me1), ENCSR000AUM (H3K4me1), ENCSR000ATO (H3K4me2), ENCSR000AVI  
 (H3K4me2), ENCSR000DPD (H3K4me3), ENCSR000AST (H3K4me3), ENCSR000ASH  
 (H3K4me3), ENCSR000ATP (H3K79me2), ENCSR000ASU (H3K79me2), ENCSR000ASV  
 (H3K9ac), ENCSR000AUN (H3K9me3), ENCSR000AUO (H4K20me1), ENCSR996DUT  
 (JUN), ENCSR000BRF (JUND), ENCSR356WVQ (KAT2B), ENCSR541WQI (MAFK),  
 ENCSR000DYG (MAX), ENCSR000BTJ (MAX), ENCSR636YLV (MAZ),  
 ENCSR000DYC (MYC), ENCSR584GHV (NFE2L2), ENCSR116TFA (NR3C1),  
 ENCSR000BJT (NR3C1), ENCSR000BHE (NR3C1), ENCSR000BHF (NR3C1),  
 ENCSR000BIO (NR3C1), ENCSR000BHG (NR3C1), ENCSR000BJR (NR3C1),  
 ENCSR000BTN (PBX3), ENCSR000DMZ (POLR2A), ENCSR000BHI (POLR2A),  
 ENCSR000BHH (POLR2A), ENCSR000DYF (POLR2AphosphoS2), ENCSR000DYE  
 (RAD21), ENCSR000BUC (RAD21), ENCSR618ICR (RCOR1), ENCSR000BQP  
 (REST), ENCSR064LJN (RFX5), ENCSR513XQX (SIN3A), ENCSR000BRM (SIN3A),  
 ENCSR000BRL (SIX5), ENCSR000BPE (SP1), ENCSR897MYK (SREBF1),  
 ENCSR638QYO (SREBF2), ENCSR000BPF (TAF1), ENCSR000BQQ (TCF12),  
 ENCSR000BUD (TEAD4), ENCSR000BPV (USF1), ENCSR000BHX (USF1),  
 ENCSR000BJB (USF1), ENCSR563FBT (USF2), ENCSR000BPM (YY1),  
 ENCSR000BPZ (ZBTB33), ENCSR277OOQ (ZC3H11A), ENCSR294JWV (ZFP36)

### **HeLa-S3 - 87 datasets**

ENCSR000DNX (BDP1), ENCSR000EDB (BRCA1), ENCSR000DNW (BRF1),  
 ENCSR000DNV (BRF2), ENCSR000EDA (CEBPB), ENCSR392EAA (CHD1),  
 ENCSR000ECP (CHD2), ENCSR000DLO (CTCF), ENCSR000DUB (CTCF),  
 ENCSR000AOA (CTCF), ENCSR000EVJ (E2F1), ENCSR000EVL (E2F4),  
 ENCSR000EVK (E2F6), ENCSR000ECI (ELK1), ENCSR000EVI (ELK4),  
 ENCSR680OFU (EP300), ENCSR000ECV (EP300), ENCSR000ATC (EZH2),  
 ENCSR000EZE (FOS), ENCSR000BHS (GABPA), ENCSR000ECZ (GTF2F1),  
 ENCSR000DNY (GTF3C2), ENCSR000AQN (H2AFZ), ENCSR000AOC (H3K27ac),  
 ENCSR000DTY (H3K27me3), ENCSR000APB (H3K27me3), ENCSR000DTZ  
 (H3K36me3), ENCSR000AOD (H3K36me3), ENCSR000APW (H3K4me1),  
 ENCSR000AOE (H3K4me2), ENCSR000DUA (H3K4me3), ENCSR000AOF (H3K4me3),  
 ENCSR000AOG (H3K79me2), ENCSR000AOH (H3K9ac), ENCSR000AQO (H3K9me3),  
 ENCSR000AOI (H4K20me1), ENCSR000EVM (HA-E2F1), ENCSR000ECH (HCFC1),  
 ENCSR000EDF (IRF3), ENCSR000EDG (JUN), ENCSR000EDH (JUND),  
 ENCSR000ECR (KAT2A), ENCSR140DSL (MAFF), ENCSR000ECK (MAFK),  
 ENCSR000ECN (MAX), ENCSR000EZF (MAX), ENCSR000ECL (MAZ),  
 ENCSR000ECU (MXI1), ENCSR000DLN (MYC), ENCSR000EZD (MYC),  
 ENCSR000DNS (NFYA), ENCSR000DNR (NFYB), ENCSR000EVN (NR2C2),  
 ENCSR000EDJ (NRF1), ENCSR000DLM (POLR2A), ENCSR000EZL (POLR2A),

ENCSR000BGO (POLR2A), ENCSR000ECT (POLR2AphosphoS2), ENCSR000DNU (POLR3A), ENCSR000ECY (PRDM1), ENCSR000EDE (RAD21), ENCSR000ECM (RCOR1), ENCSR000BMN (REST), ENCSR000ECX (RFX5), ENCSR000EZC (SMARCA4), ENCSR000EDK (SMARCB1), ENCSR000EDM (SMARCC1), ENCSR000EDL (SMARCC2), ENCSR000ECS (SMC3), ENCSR611WZO (SREBF2), ENCSR000EZK (STAT1), ENCSR000EDC (STAT3), ENCSR000ECQ (SUPT20H), ENCSR000BHT (TAF1), ENCSR000EDD (TBP), ENCSR000EVF (TCF7L2), ENCSR000EVE (TCF7L2), ENCSR000EVP (TFAP2A), ENCSR000EVO (TFAP2C), ENCSR000ECW (USF2), ENCSR184MFH (ZFP36), ENCSR855WKQ (ZHX1), ENCSR887MXT (ZHX1), ENCSR000ECJ (ZKSCAN1), ENCSR000ECO (ZNF143), ENCSR000EVG (ZNF274), ENCSR000DNT (ZZZ3)

### **H1-hESC - 81 datasets**

ENCSR000BQU (ATF2), ENCSR000BKC (ATF3), ENCSR000EBQ (BACH1), ENCSR000BMJ (BCL11A), ENCSR000BIP (BCL11A), ENCSR000EBX (BRCA1), ENCSR000EBV (CEBPB), ENCSR000EBU (CHD1), ENCSR000AQK (CHD1), ENCSR000EBT (CHD2), ENCSR000AVA (CHD7), ENCSR000BSN (CREB1), ENCSR000EUO (CTBP2), ENCSR000AMF (CTCF), ENCSR000BNH (CTCF), ENCSR000BSI (E2F6), ENCSR000BJA (EGR1), ENCSR000AUQ (EP300), ENCSR000BKK (EP300), ENCSR000ASY (EZH2), ENCSR000BNS (FOSL1), ENCSR000BIW (GABPA), ENCSR000EBP (GTF2F1), ENCSR000APX (H2AFZ), ENCSR000ANP (H3K27ac), ENCSR000ALU (H3K27me3), ENCSR000ANB (H3K36me3), ENCSR000ANA (H3K4me1), ENCSR000ANC (H3K4me2), ENCSR000AMG (H3K4me3), ENCSR000APY (H3K79me2), ENCSR000AND (H3K9ac), ENCSR000APZ (H3K9me3), ENCSR000AMH (H4K20me1), ENCSR000AVB (HDAC2), ENCSR000BNR (HDAC2), ENCSR000ATQ (HDAC6), ENCSR000ECA (JUN), ENCSR000EBZ (JUND), ENCSR000BKP (JUND), ENCSR000AVC (KDM4A), ENCSR000AQL (KDM5A), ENCSR000AUR (KDM5B), ENCSR000EBS (MAFK), ENCSR000EUP (MAX), ENCSR000BSJ (MAX), ENCSR000EBR (MXI1), ENCSR000EBY (MYC), ENCSR000BMT (NANOG), ENCSR000ECC (NRF1), ENCSR000ATK (PHF8), ENCSR000BHN (POLR2A), ENCSR000BIC (POLR2AphosphoS5), ENCSR000BMU (POU5F1), ENCSR000ECE (RAD21), ENCSR000BLD (RAD21), ENCSR000AQC (RBBP5), ENCSR000BHM (REST), ENCSR000ECF (RFX5), ENCSR000BJW (RXRA), ENCSR000ATR (SAP30), ENCSR000EBO (SIN3A), ENCSR000BIS (SIN3A), ENCSR000AUS (SIRT6), ENCSR000BIQ (SIX5), ENCSR000BIR (SP1), ENCSR000BQG (SP2), ENCSR000BQV (SP4), ENCSR000BIV (SRF), ENCSR000EUQ (SUZ12), ENCSR000ATS (SUZ12), ENCSR000BHO (TAF1), ENCSR000BLU (TAF7), ENCSR000ECB (TBP), ENCSR000BIT (TCF12), ENCSR000BRY (TEAD4), ENCSR000BIU (USF1), ENCSR000ECD (USF2), ENCSR000BKD (YY1), ENCSR000EBW (ZNF143), ENCSR000EUN (ZNF274)

### **MCF-7 - 53 datasets**

ENCSR000BSR (CEBPB), ENCSR000DMR (CTCF), ENCSR000DMO (CTCF), ENCSR000DML (CTCF), ENCSR000DMS (CTCF), ENCSR000DMV (CTCF), ENCSR000DWH (CTCF), ENCSR000AHD (CTCF), ENCSR000BUX (EGR1), ENCSR000BSS (ELF1), ENCSR000BTR (EP300), ENCSR954WVZ (ESRRA), ENCSR000BUI (FOSL2), ENCSR000BUJ (FOX M1), ENCSR000BUK (GABPA), ENCSR000EWV (GATA3), ENCSR000EWS (GATA3), ENCSR000BST (GATA3),

ENCSR557JTZ (GTF2F1), ENCSR000EWR (H3K27ac), ENCSR000EWP (H3K27me3), ENCSR000EWO (H3K36me3), ENCSR000DWJ (H3K4me3), ENCSR000EWQ (H3K9me3), ENCSR000EWX (HA-E2F1), ENCSR000BTP (HDAC2), ENCSR062HDL (HSF1), ENCSR176EXN (JUN), ENCSR000BSU (JUND), ENCSR555PBN (MAFK), ENCSR000BUL (MAX), ENCSR288IJC (MAZ), ENCSR663ZZZ (MNT), ENCSR348JOJ (MTA1), ENCSR000DMQ (MYC), ENCSR000DMM (MYC), ENCSR000DMJ (MYC), ENCSR000DMP (MYC), ENCSR000BUY (NR2F2), ENCSR000BUZ (PML), ENCSR000DMN (POLR2A), ENCSR000DMK (POLR2A), ENCSR000DMT (POLR2A), ENCSR000BTQ (RAD21), ENCSR000BSP (REST), ENCSR924TVL (RFX5), ENCSR000BUM (SIN3A), ENCSR000BVA (SRF), ENCSR000AHF (TAF1), ENCSR000BUN (TCF12), ENCSR000EWT (TCF7L2), ENCSR000BUO (TEAD4), ENCSR000EWU (ZNF217)

#### **SK-N-SH** - 44 datasets

ENCSR000DXQ (CTCF), ENCSR000EIC (CTCF), ENCSR000BLX (CTCF), ENCSR000BTA (ELF1), ENCSR000EHV (EP300), ENCSR000BUA (EP300), ENCSR000BMA (EP300), ENCSR000BVB (FOSL2), ENCSR000BTB (FOXM1), ENCSR000BTG (GABPA), ENCSR000BTH (GATA3), ENCSR000FCU (H3K27ac), ENCSR000DXP (H3K27me3), ENCSR000DXO (H3K36me3), ENCSR000FCV (H3K36me3), ENCSR000FCR (H3K4me1), ENCSR000DXR (H3K4me3), ENCSR000FCS (H3K4me3), ENCSR000FCT (H3K9me3), ENCSR000EIB (JUND), ENCSR000BSK (JUND), ENCSR000BVD (MAX), ENCSR000BVC (MEF2A), ENCSR000EIA (MXI1), ENCSR000BSV (NFIC), ENCSR000EHZ (NRF1), ENCSR000BVE (PBX3), ENCSR000BPA (POLR2AphosphoS5), ENCSR000EHX (RAD21), ENCSR000BLY (RAD21), ENCSR000BJJ (REST), ENCSR000BOZ (REST), ENCSR000EHY (RFX5), ENCSR000BVG (RXRA), ENCSR000BPB (SIN3A), ENCSR000EHW (SMC3), ENCSR000BQF (TAF1), ENCSR000BSL (TCF12), ENCSR000BUQ (TEAD4), ENCSR000BTZ (USF1), ENCSR000BMF (USF1), ENCSR000BSM (YY1), ENCSR000BLZ (YY1), ENCSR000BTS (ZBTB33)

#### **endothelial cell of umbilical vein** - 28 datasets

ENCSR000DLW (CTCF), ENCSR000DVP (CTCF), ENCSR000ALA (CTCF), ENCSR000ATA (EZH2), ENCSR000EVU (FOS), ENCSR000EVW (GATA2), ENCSR000ASC (H2AFZ), ENCSR000ALB (H3K27ac), ENCSR000DVO (H3K27me3), ENCSR000AKK (H3K27me3), ENCSR000DVM (H3K36me3), ENCSR000ALC (H3K36me3), ENCSR000AKL (H3K4me1), ENCSR000AKM (H3K4me2), ENCSR000DVN (H3K4me3), ENCSR000AKN (H3K4me3), ENCSR000ASD (H3K79me2), ENCSR000ALD (H3K9ac), ENCSR000ALE (H3K9me1), ENCSR000ATB (H3K9me3), ENCSR000ALF (H4K20me1), ENCSR000EFA (JUN), ENCSR000EEZ (MAX), ENCSR000DLU (MYC), ENCSR000DLV (POLR2A), ENCSR000EFB (POLR2A), ENCSR000BQB (POLR2A), ENCSR000BQC (POLR2AphosphoS5)

#### **HCT116** - 28 datasets

ENCSR000BUG (ATF3), ENCSR000BUH (CBX3), ENCSR000BSD (CEBPB), ENCSR000DTO (CTCF), ENCSR000BSE (CTCF), ENCSR000BRZ (EGR1), ENCSR000BVH (ELF1), ENCSR000BTE (FOSL1), ENCSR000EUT (H3K27ac), ENCSR000FCQ (H3K36me3), ENCSR000EUS (H3K4me1), ENCSR000DTQ (H3K4me3), ENCSR000FCP (H3K9me3), ENCSR000BSA (JUND), ENCSR000BSH (MAX),

ENCSR000EUU (POLR2A), ENCSR000BML (POLR2AphosphoS5), ENCSR000BSB (RAD21), ENCSR000BVI (REST), ENCSR000BSG (SIN3A), ENCSR000BSF (SP1), ENCSR000BSC (SRF), ENCSR000EUV (TCF7L2), ENCSR000BVJ (TEAD4), ENCSR000BVK (USF1), ENCSR000BNX (YY1), ENCSR000BNY (ZBTB33), ENCSR101FJM (ZNF274)

#### **ECC-1 - 24 datasets**

ENCSR000BTT (CEBPB), ENCSR000BUR (CREB1), ENCSR000BQE (CTCF), ENCSR000BSQ (EGR1), ENCSR000BUE (EP300), ENCSR000BKL (ESR1), ENCSR000BIY (ESR1), ENCSR000BIZ (ESR1), ENCSR000BQR (ESR1), ENCSR000BKW (FOXA1), ENCSR000BUS (FOXO1), ENCSR000BTY (MAX), ENCSR000BUT (NFIC), ENCSR000BJC (NR3C1), ENCSR000BKI (POLR2A), ENCSR000BTU (RAD21), ENCSR000BUU (REST), ENCSR000BTD (SRF), ENCSR000BTO (TAF1), ENCSR000BUV (TCF12), ENCSR000BSW (TEAD4), ENCSR000BSX (USF1), ENCSR000BSY (YY1), ENCSR000BSZ (ZBTB7A)

#### **fibroblast of lung - 22 datasets**

ENCSR000DWY (CTCF), ENCSR000DVA (CTCF), ENCSR000DPM (CTCF), ENCSR000ANO (CTCF), ENCSR000ARO (EZH2), ENCSR000ARP (H2AFZ), ENCSR000DPL (H3K27ac), ENCSR000AMR (H3K27ac), ENCSR000DPK (H3K27me3), ENCSR000AMS (H3K27me3), ENCSR000AMT (H3K36me3), ENCSR000AMU (H3K4me1), ENCSR000AMV (H3K4me2), ENCSR000DWZ (H3K4me3), ENCSR000DVC (H3K4me3), ENCSR000DPO (H3K4me3), ENCSR000AMW (H3K4me3), ENCSR000ASF (H3K79me2), ENCSR000AMX (H3K9ac), ENCSR000DPJ (H3K9me3), ENCSR000ARQ (H3K9me3), ENCSR000AMY (H4K20me1)

#### **keratinocyte - 18 datasets**

ENCSR000DWX (CTCF), ENCSR000ALJ (CTCF), ENCSR000ARK (EZH2), ENCSR000ARL (H2AFZ), ENCSR000ALK (H3K27ac), ENCSR000DWU (H3K27me3), ENCSR000ALL (H3K27me3), ENCSR000DWW (H3K36me3), ENCSR000ALM (H3K36me3), ENCSR000ALI (H3K4me1), ENCSR000ALN (H3K4me2), ENCSR000DWV (H3K4me3), ENCSR000ALO (H3K4me3), ENCSR000ARM (H3K79me2), ENCSR000ALP (H3K9ac), ENCSR000ALQ (H3K9me1), ENCSR000ARN (H3K9me3), ENCSR000ALR (H4K20me1)

#### **mammary epithelial cell - 16 datasets**

ENCSR000DUS (CTCF), ENCSR000ALV (CTCF), ENCSR000ARE (EZH2), ENCSR000ARF (H2AFZ), ENCSR000ALW (H3K27ac), ENCSR000DUT (H3K27me3), ENCSR000ALX (H3K27me3), ENCSR000ALY (H3K36me3), ENCSR000AMJ (H3K4me1), ENCSR000AMK (H3K4me2), ENCSR000DUQ (H3K4me3), ENCSR000AML (H3K4me3), ENCSR000ASB (H3K79me2), ENCSR000ALZ (H3K9ac), ENCSR000ARG (H3K9me3), ENCSR000AMM (H4K20me1)

#### **SUDHL6 - 14 datasets**

ENCSR125DKL (CTCF), ENCSR090TRI (EZH2), ENCSR869HJR (H2AFZ), ENCSR307DQT (H3K27ac), ENCSR511OIE (H3K27me3), ENCSR316KHQ (H3K36me3), ENCSR694PMV (H3K4me1), ENCSR804MDH (H3K4me2), ENCSR494LJG (H3K4me3), ENCSR471VHW (H3K79me2), ENCSR114GLZ (H3K9ac), ENCSR018LUP (H3K9me2),



ENCSR587FCM (H3K9me3), ENCSR538KLU (H4K20me1)

**Karpas-422** - 14 datasets

ENCSR113REG (CTCF), ENCSR646CKG (EZH2), ENCSR317NQG (H2AFZ),  
ENCSR660IQS (H3K27ac), ENCSR963HAR (H3K27me3), ENCSR867UKC (H3K36me3),  
ENCSR306VSH (H3K4me1), ENCSR870IGD (H3K4me2), ENCSR910XKX (H3K4me3),  
ENCSR604III (H3K79me2), ENCSR058SHN (H3K9ac), ENCSR473TDG (H3K9me2),  
ENCSR978BQI (H3K9me3), ENCSR159CDJ (H4K20me1)

**CD14-positive monocyte** - 14 datasets

ENCSR000ATN (CTCF), ENCSR000ASI (H2AFZ), ENCSR000ASJ (H3K27ac),  
ENCSR000DWM (H3K27me3), ENCSR000ASK (H3K27me3), ENCSR000ASL  
(H3K36me3), ENCSR000ASM (H3K4me1), ENCSR000ATE (H3K4me2), ENCSR000DWL  
(H3K4me3), ENCSR000ASN (H3K4me3), ENCSR000ASO (H3K79me2), ENCSR000ATF  
(H3K9ac), ENCSR000ASP (H3K9me3), ENCSR000ASQ (H4K20me1)

**Panc1** - 13 datasets

ENCSR000EXK (H3K27ac), ENCSR000FCO (H3K27me3), ENCSR000FCM  
(H3K36me3), ENCSR000EXJ (H3K4me1), ENCSR000EXI (H3K4me3), ENCSR000DXB  
(H3K4me3), ENCSR000FCN (H3K9me3), ENCSR000BOV (POLR2AphosphoS5),  
ENCSR000BJO (REST), ENCSR000BUP (REST), ENCSR000BPK (REST),  
ENCSR000BOW (SIN3A), ENCSR000EXL (TCF7L2)

**fibroblast of dermis** - 13 datasets

ENCSR000APM (CTCF), ENCSR000ASE (EZH2), ENCSR000ATG (H2AFZ),  
ENCSR000APN (H3K27ac), ENCSR000APO (H3K27me3), ENCSR000APP (H3K36me3),  
ENCSR000ARV (H3K4me1), ENCSR000APQ (H3K4me2), ENCSR000APR (H3K4me3),  
ENCSR000ARW (H3K79me2), ENCSR000APS (H3K9ac), ENCSR000ARX (H3K9me3),  
ENCSR000ARJ (H4K20me1)

**T-cell acute lymphoblastic leukemia** - 13 datasets

ENCSR000AQU (CTCF), ENCSR000ASW (EZH2), ENCSR000AQV (H2AFZ),  
ENCSR000AQW (H3K27ac), ENCSR000ASX (H3K27me3), ENCSR000AQX  
(H3K36me3), ENCSR000AQY (H3K4me1), ENCSR000AQZ (H3K4me2), ENCSR000ARA  
(H3K4me3), ENCSR000ARB (H3K79me2), ENCSR000ARY (H3K9ac), ENCSR000ARZ  
(H3K9me3), ENCSR000ARC (H4K20me1)

**skeletal muscle myoblast** - 13 datasets

ENCSR000ANE (CTCF), ENCSR000ARH (EZH2), ENCSR000APA (H2AFZ),  
ENCSR000ANF (H3K27ac), ENCSR000ANG (H3K27me3), ENCSR000ANH  
(H3K36me3), ENCSR000ANI (H3K4me1), ENCSR000ANJ (H3K4me2), ENCSR000ANK  
(H3K4me3), ENCSR000ANQ (H3K79me2), ENCSR000ANL (H3K9ac), ENCSR000ANR  
(H3K9me3), ENCSR000ANM (H4K20me1)

**astrocyte** - 13 datasets

ENCSR000AOO (CTCF), ENCSR000ARR (EZH2), ENCSR000AQP (H2AFZ),  
ENCSR000AOQ (H3K27ac), ENCSR000AOR (H3K27me3), ENCSR000AOS (H3K36me3),  
ENCSR000AOT (H3K4me1), ENCSR000ARS (H3K4me2), ENCSR000AOU (H3K4me3),

ENCSR000AQQ (H3K79me2), ENCSR000ART (H3K9ac), ENCSR000AQR (H3K9me3),  
ENCSR000ARU (H4K20me1)

**myotube** - 13 datasets

ENCSR000ANS (CTCF), ENCSR000ASZ (EZH2), ENCSR000ANU (H2AFZ),  
ENCSR000ANV (H3K27ac), ENCSR000ATI (H3K27me3), ENCSR000ANW (H3K36me3),  
ENCSR000ANX (H3K4me1), ENCSR000ANY (H3K4me2), ENCSR000ANZ (H3K4me3),  
ENCSR000AON (H3K79me2), ENCSR000AOY (H3K9ac), ENCSR000AQM (H3K9me3),  
ENCSR000AOZ (H4K20me1)

**DOHH2** - 12 datasets

ENCSR084RDK (CTCF), ENCSR741STU (H3K27ac), ENCSR350RYG (H3K27me3),  
ENCSR784AQY (H3K36me3), ENCSR460SEN (H3K4me1), ENCSR992YSL (H3K4me2),  
ENCSR052WRV (H3K4me3), ENCSR623GZY (H3K79me2), ENCSR696NGW (H3K9ac),  
ENCSR463DSJ (H3K9me2), ENCSR627TNG (H3K9me3), ENCSR279JHU (H4K20me1)

**HEK293** - 12 datasets

ENCSR000DTW (CTCF), ENCSR000EVB (ELK4), ENCSR000FCH (H3K27ac),  
ENCSR000FCK (H3K36me3), ENCSR000FCG (H3K4me1), ENCSR000DTU (H3K4me3),  
ENCSR000FCJ (H3K9me3), ENCSR000EZA (POLR2A), ENCSR000EUY (TCF7L2),  
ENCSR000EUZ (TRIM28), ENCSR000EVD (ZNF263), ENCSR000FCI (ZNF274)

**cardiac mesoderm** - 12 datasets

ENCSR000DSJ (H3K27me3), ENCSR000DSK (H3K27me3), ENCSR000DSL  
(H3K27me3), ENCSR000DSM (H3K27me3), ENCSR000DSF (H3K36me3),  
ENCSR000DSG (H3K36me3), ENCSR000DSH (H3K36me3), ENCSR000DSI  
(H3K36me3), ENCSR000DSD (H3K4me3), ENCSR000DSO (H3K4me3), ENCSR000DSE  
(H3K4me3), ENCSR000DSP (H3K4me3)

**MCF 10A** - 12 datasets

ENCSR000DOR (E2F4), ENCSR000DOT (FOS), ENCSR000DOO (FOS),  
ENCSR000DON (FOS), ENCSR000DOP (FOS), ENCSR000DOS (MYC),  
ENCSR000DOM (MYC), ENCSR000DPA (POLR2A), ENCSR000DPC (POLR2A),  
ENCSR000DOZ (STAT3), ENCSR000DPB (STAT3), ENCSR000DOQ (STAT3)

**osteoblast** - 12 datasets

ENCSR000APF (CTCF), ENCSR000AUD (EP300), ENCSR000APG (H2AFZ),  
ENCSR000APH (H3K27ac), ENCSR000AQS (H3K27me3), ENCSR000API (H3K36me3),  
ENCSR000APJ (H3K4me1), ENCSR000APK (H3K4me2), ENCSR000ATH (H3K4me3),  
ENCSR000ASG (H3K79me2), ENCSR000APL (H3K9me3), ENCSR000AQT (H4K20me1)

**Oci-Ly-1** - 11 datasets

ENCSR874HSH (H2AFZ), ENCSR678AFU (H3F3A), ENCSR597UDW (H3K27ac),  
ENCSR859JNA (H3K27me3), ENCSR449AYM (H3K36me3), ENCSR184QUS  
(H3K4me1), ENCSR790EDQ (H3K4me2), ENCSR422JNY (H3K4me3), ENCSR076JBA  
(H3K9ac), ENCSR768JED (H3K9me2), ENCSR189AGR (H3K9me3)

**Oci-Ly-3** - 11 datasets

ENCSR756ZKG (CTCF), ENCSR629TDG (H2AFZ), ENCSR857GMX (H3K27ac),  
ENCSR867TPP (H3K27me3), ENCSR638FRE (H3K36me3), ENCSR581LZU (H3K4me1),  
ENCSR701ZDB (H3K4me2), ENCSR548PZS (H3K4me3), ENCSR957CQH (H3K79me2),  
ENCSR996GHD (H3K9ac), ENCSR604JFH (H3K9me3)

**Oci-Ly-7** - 11 datasets

ENCSR027HML (CTCF), ENCSR331RGM (H2AFZ), ENCSR447ZGY (H3K27ac),  
ENCSR752KQT (H3K27me3), ENCSR243AIS (H3K36me3), ENCSR060WGK  
(H3K4me1), ENCSR850QKN (H3K4me2), ENCSR005SXO (H3K4me3), ENCSR660IQK  
(H3K9ac), ENCSR389WWC (H3K9me3), ENCSR747ZDF (H4K20me1)

**IMR-90** - 10 datasets

ENCSR000EFM (CEBPB), ENCSR000EFC (CHD1), ENCSR000EFI (CTCF),  
ENCSR000EFH (MAFK), ENCSR000EFF (MAZ), ENCSR000EFE (MXI1),  
ENCSR000EFK (POLR2A), ENCSR000EFJ (RAD21), ENCSR000EFG (RCOR1),  
ENCSR000EFD (RFX5)

**NT2/D1** - 9 datasets

ENCSR000EXE (H3K27me3), ENCSR000EXB (H3K36me3), ENCSR000EXA  
(H3K4me1), ENCSR000EXD (H3K4me3), ENCSR000EXC (H3K9ac), ENCSR000EWZ  
(H3K9me3), ENCSR000EXH (SUZ12), ENCSR000EXG (YY1), ENCSR000EWY  
(ZNF274)

**GM12891** - 9 datasets

ENCSR000BJH (PAX5), ENCSR000EAJ (POLR2A), ENCSR000BIK (POLR2A),  
ENCSR000BIL (POLR2AphosphoS5), ENCSR000BII (POU2F2), ENCSR000EAI  
(RELA), ENCSR000BIJ (SPI1), ENCSR000BIM (TAF1), ENCSR000BKJ (YY1)

**T47D** - 9 datasets

ENCSR000BNO (CTCF), ENCSR000BLM (EP300), ENCSR000BQD (ESR1),  
ENCSR000BLL (ESR1), ENCSR000BJS (ESR1), ENCSR000BKN (ESR1),  
ENCSR000BKY (FOXA1), ENCSR000BMX (GATA3), ENCSR000BVO (JUND)

**neural cell** - 8 datasets

ENCSR822CEA (CTCF), ENCSR843ZUP (EP300), ENCSR934NHU (MXI1),  
ENCSR000BTW (POLR2AphosphoS5), ENCSR198ZYJ (RAD21), ENCSR000BTV  
(REST), ENCSR404BPV (SMC3), ENCSR000BTX (TAF1)

**B cell** - 8 datasets

ENCSR000AUV (CTCF), ENCSR000AUZ (EZH2), ENCSR000AUX (H2AFZ),  
ENCSR000AUP (H3K27ac), ENCSR000AUY (H3K4me2), ENCSR000DQR (H3K4me3),  
ENCSR000DQP (H3K4me3), ENCSR000AVJ (H4K20me1)

**GM12892** - 7 datasets

ENCSR000BJI (PAX5), ENCSR000EAM (POLR2A), ENCSR000BHZ (POLR2A),  
ENCSR000BIA (POLR2AphosphoS5), ENCSR000EAN (RELA), ENCSR000BIB (TAF1),  
ENCSR000BLT (YY1)

**HL-60** - 6 datasets

ENCSR000DUP (CTCF), ENCSR000BTK (GABPA), ENCSR000DUO (H3K4me3),  
ENCSR000BTL (POLR2AphosphoS5), ENCSR000BTF (REST), ENCSR000BUW (SPI1)

**PFSK-1** - 6 datasets

ENCSR000BGA (FOXP2), ENCSR000BPC (POLR2AphosphoS5), ENCSR000BJP  
(REST), ENCSR000BOX (REST), ENCSR000BOY (SIN3A), ENCSR000BQN (TAF1)

**NB4** - 5 datasets

ENCSR000DWN (CTCF), ENCSR000DWP (H3K4me3), ENCSR000EHS (MAX),  
ENCSR000EHR (MYC), ENCSR000FAL (POLR2A)

**U2OS** - 4 datasets

ENCSR000EYE (H3K36me3), ENCSR000EYF (H3K9me3), ENCSR000EYD (SETDB1),  
ENCSR000EYC (TRIM28)

**mononuclear cell** - 4 datasets

ENCSR000EXW (H3K27me3), ENCSR000EXV (H3K4me1), ENCSR000EXT  
(H3K4me3), ENCSR000EXU (H3K9me3)

**bronchial epithelial cell** - 4 datasets

ENCSR000DXI (CTCF), ENCSR000DXK (H3K27me3), ENCSR000DXH (H3K36me3),  
ENCSR000DXJ (H3K4me3)

**foreskin fibroblast** - 4 datasets

ENCSR000DWQ (CTCF), ENCSR000DUH (CTCF), ENCSR000DWS (H3K4me3),  
ENCSR000DUJ (H3K4me3)

**kidney epithelial cell** - 4 datasets

ENCSR000DVH (CTCF), ENCSR000DVF (H3K27me3), ENCSR000DVE (H3K36me3),  
ENCSR000DVG (H3K4me3)

**GM06990** - 4 datasets

ENCSR000DQW (CTCF), ENCSR000DQU (H3K27me3), ENCSR000DQT (H3K36me3),  
ENCSR000DQV (H3K4me3)

**Caco-2** - 4 datasets

ENCSR000DQN (CTCF), ENCSR000DQL (H3K27me3), ENCSR000DQK (H3K36me3),  
ENCSR000DQM (H3K4me3)

**BJ** - 4 datasets

ENCSR000DQI (CTCF), ENCSR000DQG (H3K27me3), ENCSR000DQF (H3K36me3),  
ENCSR000DQH (H3K4me3)

**LNCaP clone FGC** - 3 datasets

ENCSR000DME (CTCF), ENCSR000DMF (CTCF), ENCSR000DWF (H3K4me3)

**erythroblast** - 3 datasets

ENCSR000EXR (GATA1), ENCSR000EXP (GATA1), ENCSR000EXO (POLR2A)

**WI38** - 3 datasets

ENCSR000DYB (CTCF), ENCSR000DXY (H3K4me3), ENCSR000DXZ (H3K4me3)

**cardiac fibroblast** - 3 datasets

ENCSR000DTF (CTCF), ENCSR000DTH (H3K4me3), ENCSR000DTE (H3K4me3)

**H7-hESC** - 3 datasets

ENCSR000DST (H3K27me3), ENCSR000DSS (H3K36me3), ENCSR000DSR (H3K4me3)

**H54** - 2 datasets

ENCSR000DKN (CTCF), ENCSR000DKM (POLR2A)

**SH-SY5Y** - 2 datasets

ENCSR000EYB (GATA2), ENCSR000EXZ (GATA3)

**GM08714** - 2 datasets

ENCSR000FCL (H3K4me3), ENCSR000EUI (ZNF274)

**WERI-Rb-1** - 2 datasets

ENCSR000DXW (CTCF), ENCSR000DXU (H3K4me3)

**SK-N-MC** - 2 datasets

ENCSR000BGB (FOXP2), ENCSR000DXL (H3K4me3)

**epithelial cell of proximal tubule** - 2 datasets

ENCSR000DXD (CTCF), ENCSR000DXF (H3K4me3)

**fibroblast of villous mesenchyme** - 2 datasets

ENCSR000DVQ (CTCF), ENCSR000DVS (H3K4me3)

**retinal pigment epithelial cell** - 2 datasets

ENCSR000DVI (CTCF), ENCSR000DVK (H3K4me3)

**fibroblast of pulmonary artery** - 2 datasets

ENCSR000DUX (CTCF), ENCSR000DUZ (H3K4me3)

**fibroblast of mammary gland** - 2 datasets

ENCSR000DUU (CTCF), ENCSR000DUW (H3K4me3)

**HFF-Myc** - 2 datasets

ENCSR000DUM (CTCF), ENCSR000DUK (H3K4me3)

**epithelial cell of esophagus** - 2 datasets

ENCSR000DTR (CTCF), ENCSR000DTT (H3K4me3)

**choroid plexus epithelial cell - 2 datasets**  
ENCSR000DTL (CTCF), ENCSR000DTN (H3K4me3)

**cardiac muscle cell - 2 datasets**  
ENCSR000DTI (CTCF), ENCSR000DTK (H3K4me3)

**brain microvascular endothelial cell - 2 datasets**  
ENCSR000DTA (CTCF), ENCSR000DTC (H3K4me3)

**astrocyte of the cerebellum - 2 datasets**  
ENCSR000DSZ (CTCF), ENCSR000DSY (H3K4me3)

**astrocyte of the spinal cord - 2 datasets**  
ENCSR000DSU (CTCF), ENCSR000DSW (H3K4me3)

**GM12875 - 2 datasets**  
ENCSR000DRU (CTCF), ENCSR000DRS (H3K4me3)

**GM12865 - 2 datasets**  
ENCSR000DRE (CTCF), ENCSR000DRC (H3K4me3)

**GM12864 - 2 datasets**  
ENCSR000DRB (CTCF), ENCSR000DQZ (H3K4me3)

**BE2C - 2 datasets**  
ENCSR000DQD (CTCF), ENCSR000DQB (H3K4me3)

**fibroblast of the aortic adventitia - 2 datasets**  
ENCSR000DPY (CTCF), ENCSR000DQA (H3K4me3)

**fibroblast of skin of abdomen - 2 datasets**  
ENCSR000DPV (CTCF), ENCSR000DPX (H3K4me3)

**fibroblast of gingiva - 2 datasets**  
ENCSR000DPS (CTCF), ENCSR000DPU (H3K4me3)

**fibroblast of pedal digit skin - 2 datasets**  
ENCSR000DPP (CTCF), ENCSR000DPR (H3K4me3)

**fibroblast of upper leg skin - 2 datasets**  
ENCSR000DPG (CTCF), ENCSR000DPI (H3K4me3)

**GM15510 - 2 datasets**  
ENCSR000EAR (POLR2A), ENCSR000EAQ (RELA)

**GM19193 - 2 datasets**  
ENCSR000EBK (POLR2A), ENCSR000EBM (RELA)

**GM18951** - 2 datasets  
ENCSR000EBC (POLR2A), ENCSR000EBD (RELA)

**GM19099** - 2 datasets  
ENCSR000EBG (POLR2A), ENCSR000EBI (RELA)

**GM18505** - 2 datasets  
ENCSR000EAU (POLR2A), ENCSR000EAW (RELA)

**GM18526** - 2 datasets  
ENCSR000EAY (POLR2A), ENCSR000EBA (RELA)

**GM10847** - 2 datasets  
ENCSR000DYO (POLR2A), ENCSR000DYM (RELA)

**Loucy** - 1 dataset  
ENCSR900HAP (H2AFZ)

**spleen** - 1 dataset  
ENCSR000DNI (CTCF)

**pancreas** - 1 dataset  
ENCSR000DND (CTCF)

**medulloblastoma** - 1 dataset  
ENCSR000DMY (CTCF)

**lung** - 1 dataset  
ENCSR000DMH (CTCF)

**kidney** - 1 dataset  
ENCSR000DMC (CTCF)

**GM20000** - 1 dataset  
ENCSR000DLG (CTCF)

**GM13977** - 1 dataset  
ENCSR000DLB (CTCF)

**GM13976** - 1 dataset  
ENCSR000DKZ (CTCF)

**GM10266** - 1 dataset  
ENCSR000DKR (CTCF)

**GM10248** - 1 dataset  
ENCSR000DKP (CTCF)

**Raji** - 1 dataset

ENCSR000EXX (POLR2A)

**skeletal muscle cell** - 1 dataset

ENCSR000DXT (H3K4me3)

**Jurkat** - 1 dataset

ENCSR000DVU (H3K4me3)

**GM12874** - 1 dataset

ENCSR000DRR (CTCF)

**GM12873** - 1 dataset

ENCSR000DRP (CTCF)

**GM12872** - 1 dataset

ENCSR000DRN (CTCF)

**GM12801** - 1 dataset

ENCSR000DQY (CTCF)
